# Supplementary material for: Soft-bottom fishes and spatial protection: findings from a temperate marine protected area
Source: PeerJ journal article supplement (doi:10.7717/peerj.4653), 2018-06-08

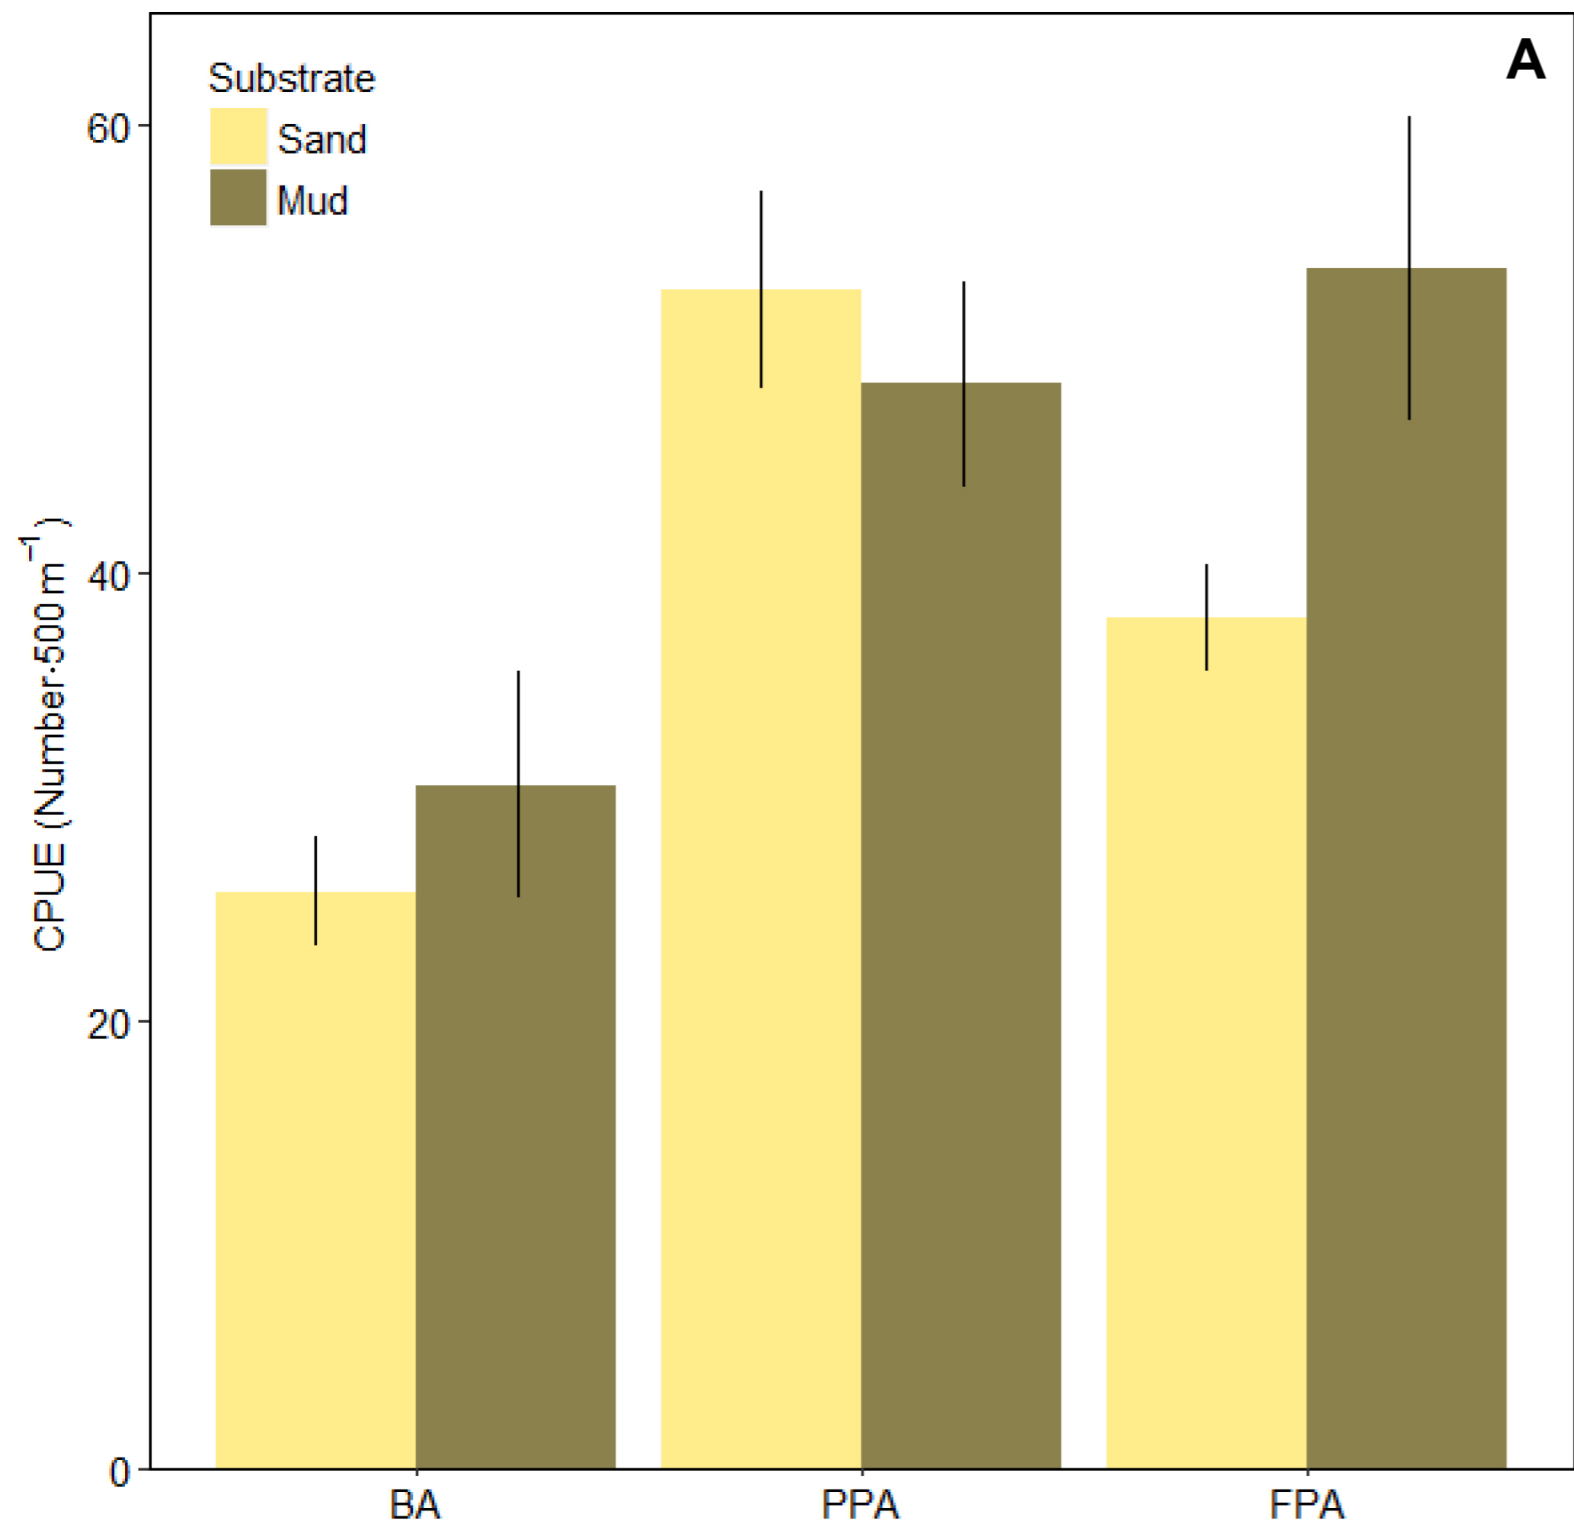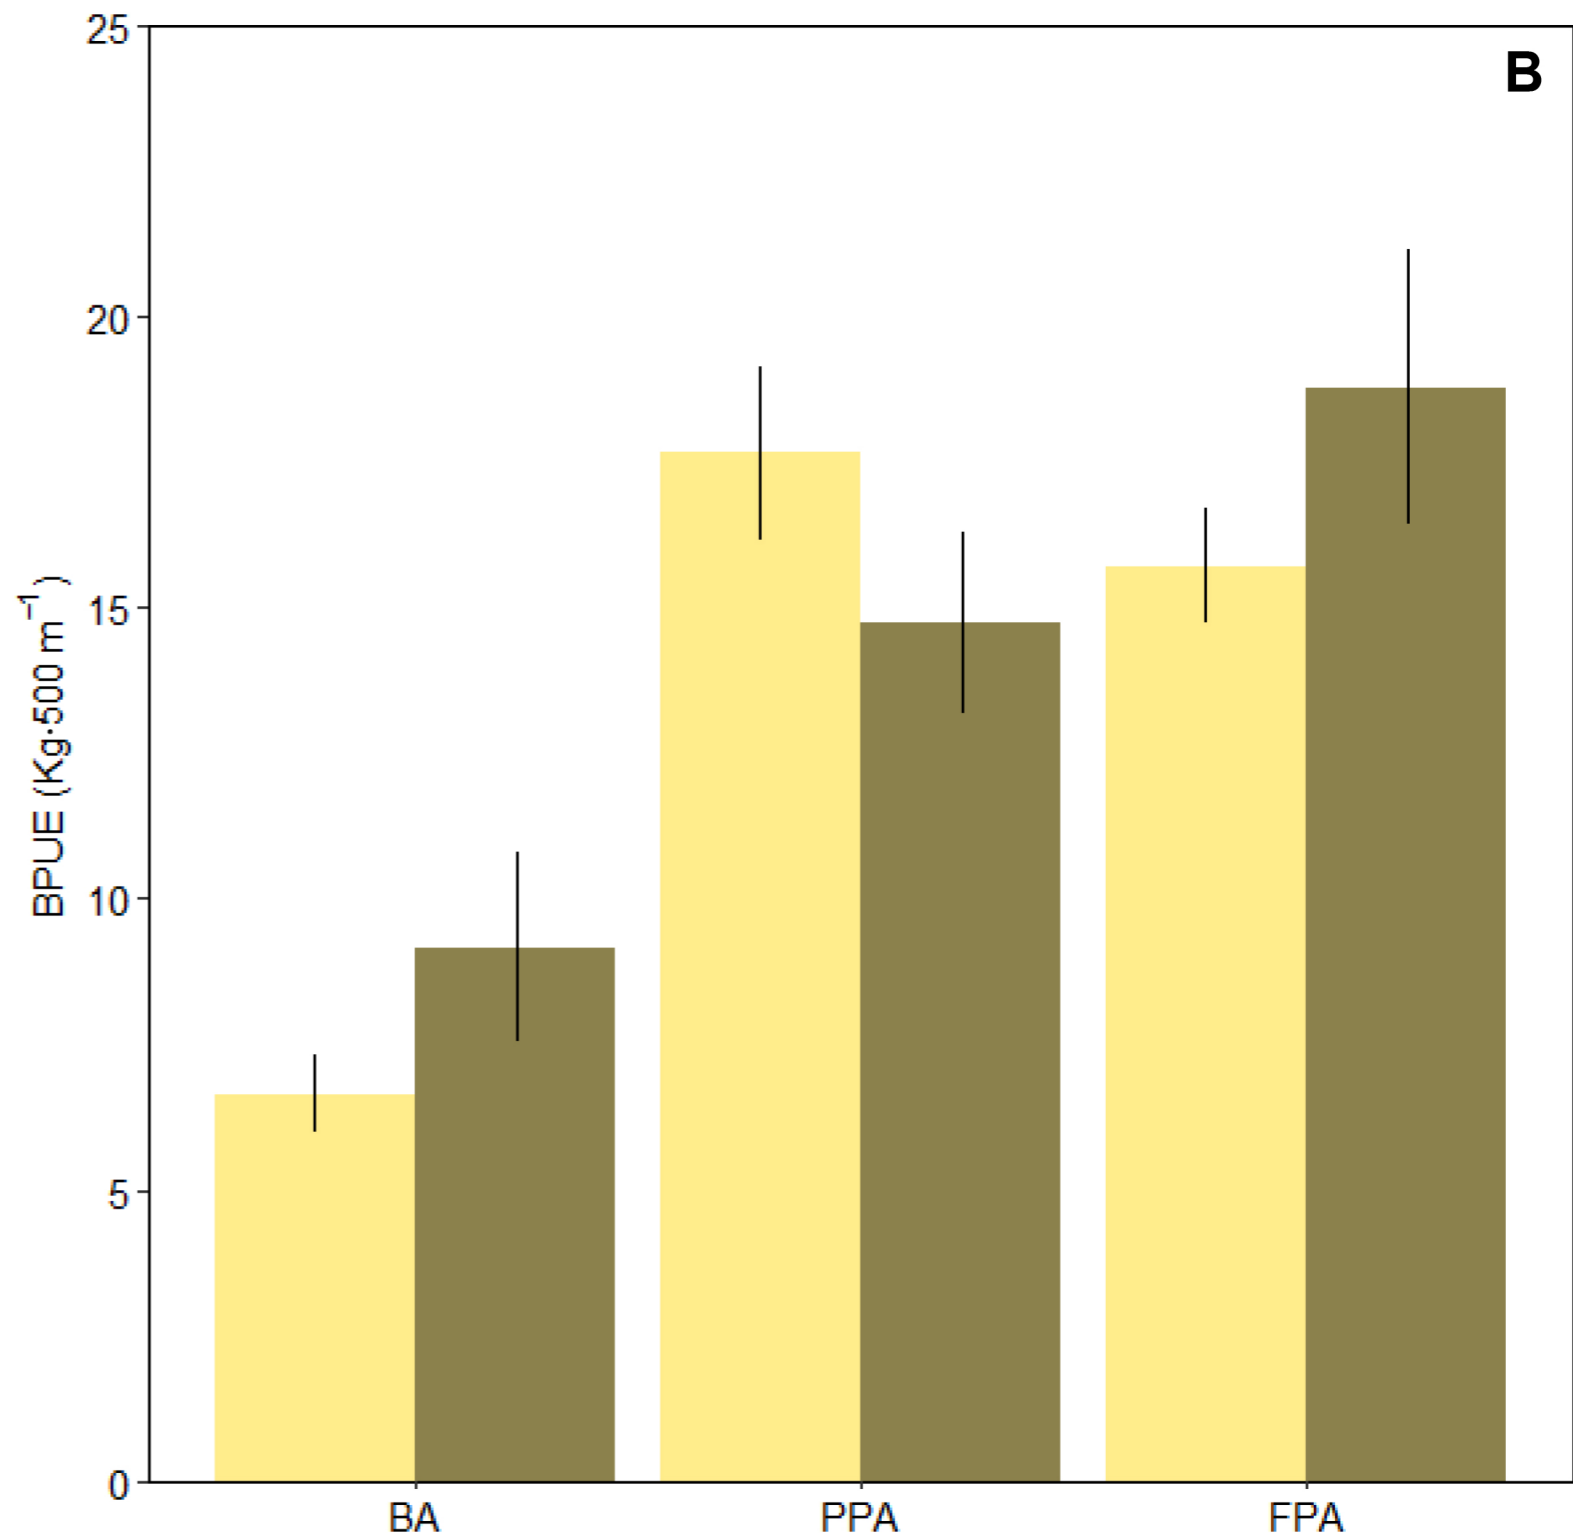

Supplement: FigS1.pdf [file FigS1.pdf]
