# Supplementary material for: Soft-bottom fishes and spatial protection: findings from a temperate marine protected area
Source: PeerJ. 2018 Jun 8;6:e4653. doi: 10.7717/peerj.4653 (PMC5995104; doi:10.7717/peerj.4653)
Supplement: Table S1 — List of fish species sampled during the experimental fishing surveys in the Luiz Saldanha Marine Park, and corresponding references (full references in File S1) used for length-weight (L-W) relationships (for all species except pelagics). The environment, maximum length reported (Froese and Pauly 2017, fishbase.org) and fisheries category (target, bycatch, non-commercial) of each species are also shown. (1) Dimension considered: disc width. [file peerj-06-4653-s002.xls]

## Sheet: TableS1
							continuation
	Species	L-W reference	Environment	Maximum	Fisheries			Species	L-W reference	Environment	Maximum	Fisheries
				length (cm)	category						length (cm)	category
Actinopterygii							Actinopterygii
	Argyrosomus regius	Santos et al. (2002)	Benthopelagic	230	Target			Scophthalmus maximus	Dorel (1986)	Benthic	100	Target
	Arnoglossus imperialis	Borges et al. (2003)	Benthic	25	Bycatch			Scophthalmus rhombus	Veiga et al. (2009)	Benthic	75	Target
	Arnoglossus laterna	Veiga et al. (2009)	Benthic	25	Bycatch			Scorpaena porcus	Petrakis & Stergiou (1995)	Benthic	41	Non-commercial
	Arnoglossus thori	Santos et al. (2002)	Benthic	18	Bycatch			Scyliorhinus canicula	Santos et al. (2002)	Benthic	100	Target
	Auxis rochei	–	Pelagic	50	Target			Serranus cabrilla	Gonçalves et al. (1997)	Benthic	40	Target
	Balistes capriscus	Santos et al. (2002)	Benthopelagic	60	Target			Solea senegalensis	Veiga et al. (2009)	Benthic	60	Target
	Boops boops	–	Pelagic	36	Non-commercial			Solea solea	Veiga et al. (2009)	Benthic	70	Target
	Bothus podas	Morato et al. (2001)	Benthic	45	Bycatch			Sparus aurata	Veiga et al. (2009)	Benthopelagic	70	Target
	Chelidonichthys lastoviza	Santos et al. (2002)	Benthic	40	Bycatch			Spicara maena	Valle et al. (2003)	Benthopelagic	25	Bycatch
	Chelidonichthys lucerna	Santos et al. (2002)	Benthic	75	Target			Spondyliosoma cantharus	Veiga et al. (2009)	Benthopelagic	60	Target
	Chelidonichthys obscurus	Santos et al. (2002)	Benthic	34	Bycatch			Synapturichthys kleinii	Dulcic & Kraljevic (1996)	Benthic	40	Target
	Citharus linguatula	Santos et al. (2002)	Benthic	30	Bycatch			Trachinus draco	Santos et al. (2002)	Benthic	53	Non-commercial
	Conger conger	Gonçalves et al. (1997)	Benthic	300	Target			Trachurus picturatus	–	Pelagic	60	Target
	Dagetichthys lusitanicus	Cabral et al. (2003)	Benthic	40	Target			Trachurus trachurus	–	Pelagic	70	Target
	Dentex gibbosus	Mennes (1985)	Benthopelagic	106	Target			Trisopterus luscus	Santos et al. (2002)	Benthopelagic	46	Target
	Dicentrarchus labrax	Gonçalves et al. (1997)	Benthopelagic	103	Target			Uranoscopus scaber	Mendes et al. (2004)	Benthic	40	Bycatch
	Dicologlossa cuneata	Santos et al. (2002)	Benthic	30	Target			Zeus faber	Morey et al. (2003)	Benthopelagic	90	Bycatch
	Diplodus sargus	Veiga et al. (2009)	Benthopelagic	45	Target		Elasmobranchii
	Diplodus vulgaris	Veiga et al. (2009)	Benthopelagic	45	Target			Aetomylaeus bovinus	Basusta et al. (2012)	Benthopelagic	222 (1)	Non-commercial
	Halobatrachus didactylus	Veiga et al. (2009)	Benthic	50	Target			Dasyatis pastinaca	Filiz & Bilge (2004)	Benthic	57 (1)	Bycatch
	Labrus bergylta	Santos et al. (2002)	Benthopelagic	66	Bycatch			Mustelus mustelus	Filiz & Bilge (2004)	Benthopelagic	200	Target
	Lepidorhombus boscii	Mendes et al. (2004)	Benthic	40	Bycatch			Myliobatis aquila	Filiz & Bilge (2004)	Benthopelagic	183 (1)	Non-commercial
	Lophius budegassa	Morey et al. (2003)	Benthic	100	Target			Raja brachyura	Dorel (1986)	Benthic	125	Target
	Merluccius merluccius	Santos et al. (2002)	Benthopelagic	140	Target			Raja clavata	Mendes et al. (2004)	Benthic	139	Target
	Microchirus azevia	Veiga et al. (2009)	Benthic	40	Target			Raja miraletus	Mendes et al. (2004)	Benthic	63	Target
	Microchirus ocellatus	Mendes et al. (2004)	Benthic	20	Target			Raja undulata	Veiga et al. (2009)	Benthic	100	Target
	Microchirus variegatus	Mendes et al. (2004)	Benthic	35	Target			Rostroraja alba	Ismen et al. (2007)	Benthic	240	Target
	Micromesistius poutassou	Santos et al. (2002)	Benthopelagic	50	Bycatch			Torpedo cf. mackayana	Veiga et al. (2009)	Benthic	39	Target
	Mugil cephalus	Koutrakis & Tsikliras (2003)	Benthopelagic	100	Bycatch			Torpedo marmorata	Filiz & Bilge (2004)	Benthic	100	Target
	Mullus surmuletus	Veiga et al. (2009)	Benthic	40	Target			Torpedo torpedo	Veiga et al. (2009)	Benthic	60	Target
	Pagellus acarne	Veiga et al. (2009)	Benthopelagic	26	Target
	Pagellus bogaraveo	Veiga et al. (2009)	Benthopelagic	70	Target
	Pagellus erythrinus	Gonçalves et al. (1997)	Benthopelagic	60	Target
	Pagrus auriga	Pajuelo et al. (2006)	Benthopelagic	80	Target
	Pagrus pagrus	Santos et al. (2002)	Benthopelagic	91	Target
	Pegusa lascaris	Veiga et al. (2009)	Benthic	40	Target
	Phycis phycis	Mendes et al. (2004)	Benthopelagic	65	Target
	Sarda sarda	–	Pelagic	92	Target
	Sardina pilchardus	–	Pelagic	28	Target
	Scomber colias	–	Pelagic	64	Target
	Scomber scombrus	–	Pelagic	60	Target
