# Supplementary material for: Soft-bottom fishes and spatial protection: findings from a temperate marine protected area
Source: PeerJ. 2018 Jun 8;6:e4653. doi: 10.7717/peerj.4653 (PMC5995104; doi:10.7717/peerj.4653)
Supplement: Table S5 — Mean (and standard error - SE) species abundance (CPUE - n⋅500 m−1) per substrate type. Only species with frequency of occurrence higher than 15% are shown. [file peerj-06-4653-s006.xls]

## Sheet: TableS5
	Abundance (CPUE - n∙500 m-1) per substrate
		Sand			Mud
	Taxa/Species	Mean	SE		Mean	SE
	Actinopterygii	34.6	1.8		42.22	3.37
	Arnoglossus imperialis	0.5	0.07		0.03	0.02
	Bothus podas	3.97	0.97		0.27	0.2
	Chelidonichthys lucerna	1.93	0.2		3.97	0.59
	Chelidonichthys obscurus	5.34	0.47		2.13	0.35
	Citharus linguatula	0.08	0.04		0.88	0.2
	Halobatrachus didactylus	1.18	0.18		0.63	0.18
	Merluccius merluccius	1.34	0.18		3.55	0.45
	Microchirus azevia	6.55	0.9		18.92	2.29
	Mullus surmuletus	0.43	0.07		0.69	0.15
	Pegusa lascaris	1.27	0.35		0.03	0.02
	Solea senegalensis	6.1	0.46		0.91	0.27
	Solea solea	0.15	0.06		3.33	0.81
	Trigloporus lastoviza	2.26	0.28		3.2	0.58
	Elasmobranchii	5.93	0.7		2.7	0.3
	Mustelus mustelus	0.23	0.08		0.38	0.12
	Myliobatis aquila	2.66	0.57		0.11	0.07
	Raja clavata	0.92	0.15		1.44	0.2
	Raja undulata	0.24	0.05		0.03	0.02
	Rostroraja alba	0.55	0.1		0.28	0.09
	Torpedo torpedo	1.02	0.18		0	0
	TOTAL	40.53	1.7		44.92	3.34
