# Supplementary material for: Soft-bottom fishes and spatial protection: findings from a temperate marine protected area
Source: PeerJ. 2018 Jun 8;6:e4653. doi: 10.7717/peerj.4653 (PMC5995104; doi:10.7717/peerj.4653)
Supplement: Table S6 — Mean (and standard error - SE) species abundance (CPUE - n⋅500 m−1) in each leaf of the multivariate regression tree analysis (MRT) (Leaf I - Muddy BA & PPA; Leaf II - Muddy FPA; Leaf III - Sandy BA; Leaf IV - Sandy PPA & FPA, Period 1; Leaf V - Sandy PPA & FPA, Period 2). [file peerj-06-4653-s007.xls]

## Sheet: TableS6
																	continuation
Abundance (CPUE - n∙500 m-1) per leaf (MRT)																	Abundance (CPUE - n∙500 m-1) per leaf (MRT)
	Leaf I			Leaf II			Leaf III			Leaf IV			Leaf V					Leaf I			Leaf II			Leaf III			Leaf IV			Leaf V
Species	Mean	SE		Mean	SE		Mean	SE		Mean	SE		Mean	SE			Species	Mean	SE		Mean	SE		Mean	SE		Mean	SE		Mean	SE
Aetomylaeus bovinus	0	0		0	0		0	0		0.217391	0.125054		0.0181818	0.0181818			Pagrus pagrus	0.125	0.063926		0.0384615	0.0384615		0.0285714	0.0285714		0.26087	0.26087		0.290909	0.102733
Argyrosomus regius	0	0		0	0		0.0857143	0.0631316		0.0434783	0.0434783		0	0			Pegusa lascaris	0.05	0.0348991		0	0		3.34286	1.04112		0.695652	0.277159		0.236364	0.0776925
Arnoglossus imperialis	0.05	0.0348991		0	0		0.657143	0.115539		0.217391	0.0879391		0.545455	0.112571			Phycis phycis	0.025	0.025		0.0769231	0.0532939		0.0571429	0.0398075		0.130435	0.071802		0.0181818	0.0181818
Arnoglossus laterna	0	0		0	0		0	0		0.0434783	0.0434783		0	0			Raja brachyura	0.025	0.025		0	0		0	0		0.0869565	0.0869565		0.0363636	0.0254738
Arnoglossus thori	0	0		0	0		0	0		0.304348	0.132396		0	0			Raja clavata	1.375	0.323616		2	0.355181		0.0571429	0.0398075		0.347826	0.11943		1.47273	0.207364
Auxis rochei	0	0		0	0		0	0		0	0		0.0181818	0.0181818			Raja miraletus	0.1	0.0599145		0	0		0	0		0	0		0	0
Balistes capriscus	0.1	0.0599145		0.0769231	0.0769231		1.14286	0.515545		0.347826	0.204772		0.527273	0.221496			Raja undulata	0.025	0.025		0.0384615	0.0384615		0.2	0.0799159		0.347826	0.101543		0.236364	0.0684786
Bothus podas	0.425	0.313965		0	0		2.74286	0.882455		5.26087	1.9216		4.34545	1.79021			Rostroraja alba	0.35	0.126845		0.153846	0.0910166		0.2	0.0987314		0.130435	0.0954363		0.963636	0.174007
Chelidonichthys lastoviza	4.45	0.841206		1.42308	0.400665		0.0571429	0.0398075		2.82609	0.618081		3.32727	0.430374			Sarda sarda	0.025	0.025		0	0		0.0285714	0.0285714		0	0		0	0
Chelidonichthys lucerna	4.325	0.816016		3.23077	0.742776		0.885714	0.223687		1.3913	0.375848		2.83636	0.326973			Scophthalmus maximus	0	0		0	0		0.0857143	0.0480096		0	0		0.0727273	0.0353391
Chelidonichthys obscurus	3.225	0.485016		0.538462	0.278627		5.42857	0.943163		6.6087	1.44974		4.81818	0.474317			Scophthalmus rhombus	0	0		0.0384615	0.0384615		0.2	0.0799159		0.304348	0.116517		0.145455	0.0479771
Citharus linguatula	0.275	0.118687		1.76923	0.408779		0	0		0.0434783	0.0434783		0.127273	0.0736474			Scorpaena porcus	0.05	0.05		0.115385	0.0638971		0.0285714	0.0285714		0.0434783	0.0434783		0	0
Conger conger	0.05	0.0348991		0.115385	0.0638971		0.0285714	0.0285714		0.0434783	0.0434783		0.127273	0.0522526			Scyliorhinus canicula	0.275	0.101195		0.423077	0.113315		0	0		0.0434783	0.0434783		0.0181818	0.0181818
Dagetichthys lusitanicus	0	0		0	0		0	0		0.0434783	0.0434783		0.0363636	0.0254738			Serranus cabrilla	0.275	0.107343		0.961538	0.280004		0	0		0	0		0	0
Dasyatis pastinaca	0	0		0.153846	0.153846		0	0		0.217391	0.139968		0.272727	0.13597			Solea senegalensis	0.875	0.224144		1	0.573786		4.42857	0.694862		10	1.31426		5.70909	0.530975
Dentex gibbosus	0.025	0.025		0	0		0	0		0	0		0	0			Solea solea	0.375	0.184972		7.61538	1.65583		0	0		0.478261	0.250451		0.109091	0.0424242
Dicentrarchus labrax	0	0		0	0		0.0285714	0.0285714		0	0		0.0545455	0.0309031			Sparus aurata	0.025	0.025		0	0		0.0571429	0.0571429		0	0		0	0
Dicologlossa cuneata	0	0		0	0		0.257143	0.11109		0.347826	0.134967		0.181818	0.0864212			Spicara maena	0	0		0	0		0	0		0	0		0.0181818	0.0181818
Diplodus sargus	0	0		0	0		0.0571429	0.0398075		0.0434783	0.0434783		0.0545455	0.0309031			Spondyliosoma cantharus	0.25	0.146541		0.692308	0.307692		0.171429	0.14486		0.0869565	0.0869565		0.327273	0.110263
Diplodus vulgaris	0.05	0.0348991		0.192308	0.0963843		0.0285714	0.0285714		0.130435	0.130435		0.327273	0.157964			Synapturichthys kleinii	0.025	0.025		0	0		0.0285714	0.0285714		0	0		0.0181818	0.0181818
Halobatrachus didactylus	0.05	0.0348991		1.61538	0.392534		0.2	0.106904		2.13043	0.404052		1.38182	0.297567			Torpedo cf. mackayana	0	0		0	0		0	0		0	0		0.0181818	0.0181818
Labrus bergylta	0	0		0	0		0.0857143	0.0631316		0	0		0	0			Torpedo marmorata	0.025	0.025		0	0		0	0		0	0		0	0
Lepidorhombus boscii	0	0		0.615385	0.502538		0	0		0	0		0	0			Torpedo torpedo	0	0		0	0		0.542857	0.170727		1.47826	0.319767		1.16364	0.340097
Lophius budegassa	0.075	0.0553254		0	0		0	0		0	0		0	0			Trachinus draco	0.025	0.025		0	0		0.2	0.0987314		0.0869565	0.0869565		0.363636	0.135745
Merluccius merluccius	3.4	0.581554		3.5	0.682191		1.74286	0.4003		1.82609	0.513271		0.927273	0.15966			Trisopterus luscus	0.8	0.33817		0.923077	0.4365		0.0571429	0.0571429		0.0869565	0.0600739		0.0909091	0.0536401
Microchirus azevia	14.725	1.85258		24.2308	4.76051		0.971429	0.489359		4.95652	1.57861		10.8545	1.52099			Uranoscopus scaber	0	0		0	0		0.0285714	0.0285714		0	0		0	0
Microchirus ocellatus	0.1	0.0599145		0.0384615	0.0384615		0	0		0	0		0	0			Zeus faber	0.075	0.0421764		0.0384615	0.0384615		0.114286	0.0682485		0.0434783	0.0434783		0.109091	0.0424242
Microchirus variegatus	0.1	0.0480384		0.307692	0.14432		0	0		0	0		0	0
Micromesistius poutassou	0.05	0.0348991		0	0		0.0571429	0.0398075		0.0434783	0.0434783		0	0
Mugil cephalus	0.05	0.05		0.0769231	0.0532939		0.0571429	0.0398075		0.26087	0.143604		0	0
Mullus surmuletus	0.875	0.218349		0.346154	0.110137		0.257143	0.118413		0.391304	0.12157		0.581818	0.123613
Mustelus mustelus	0.4	0.174679		0.307692	0.121139		0.0857143	0.0631316		0.217391	0.177338		0.345455	0.137848
Myliobatis aquila	0.05	0.0348991		0.192308	0.157081		0.257143	0.103249		6.65217	2.16019		2.61818	0.660828
Pagellus acarne	0.7	0.575348		0	0		0.542857	0.299419		1.52174	0.864014		0.4	0.138778
Pagellus bogaraveo	0.05	0.0348991		0.0384615	0.0384615		0	0		0	0		0	0
Pagellus erythrinus	0	0		0.0769231	0.0532939		0.0571429	0.0398075		0	0		0.0909091	0.039121
Pagrus auriga	0	0		0	0		0.0285714	0.0285714		0	0		0.0181818	0.0181818
