# Supplementary material for: Soft-bottom fishes and spatial protection: findings from a temperate marine protected area
Source: PeerJ. 2018 Jun 8;6:e4653. doi: 10.7717/peerj.4653 (PMC5995104; doi:10.7717/peerj.4653)
Supplement: Table S7 — Discriminant species at each leaf (terminal node) of the multivariate regression tree analysis (Leaf I - Muddy BA & PPA; Leaf II - Muddy FPA; Leaf III - Sandy BA; Leaf IV - Sandy PPA & FPA, Period 1; Leaf V - Sandy PPA & FPA, Period 2). Indicator values (IndVal) are shown (species ordered according to decreasing IndVal) and the symbol ‘*’ signalizes the indicator species (highest IndVal obtained for that species was in that node) (note: discriminant species with IndVal ≥ 20 are shown in Fig. 7). [file peerj-06-4653-s008.xls]

## Sheet: TableS7
	Discriminant species
	for each leaf (terminal node)
	Species	IndVal
	Leaf I
	Chelidonichthys lastoviza	27
	Merluccius merluccius	24*
	Mullus surmuletus	19*
	Raja miraletus	8*
	Leaf II
	Solea solea	71
	Citharus linguatula	61*
	Microchirus azevia	32
	Serranus cabrilla	31*
	Raja clavata	25
	Scyliorhinus canicula	19*
	Lepidorhombus boscii	12*
	Microchirus variegatus	11*
	Leaf III
	Pegusa lascaris	43*
	Arnoglossus imperialis	29*
	Chelidonichthys obscurus	29
	Bothus podas	19*
	Balistes capriscus	13*
	Leaf IV
	Solea senegalensis	34
	Torpedo torpedo	26*
	Arnoglossus thori	19*
	Halobatrachus didactylus	19*
	Myliobatis aquila	19*
	Aetomylaeus bovinus	12*
	Raja undulata	12*
	Dicologlossa cuneata	11*
	Scophthalmus rhombus	11*
	Leaf V
	Chelidonichthys lucerna	24
	Rostroraja alba	24*
