# Supplementary material for: Soft-bottom fishes and spatial protection: findings from a temperate marine protected area
Source: PeerJ. 2018 Jun 8;6:e4653. doi: 10.7717/peerj.4653 (PMC5995104; doi:10.7717/peerj.4653)
Supplement: Table S8 — Summary table of the ratio (Protected area:Buffer area; After MPA Full Implementation:Before MPA Full Implementation) analyses (N - abundance, B - biomass, L - total length) and multivariate regression tree (MRT) (MRT Ind Spp - cluster where the species was assigned as indicator) (BA - buffer area; PPA - partially protected area; FPA - fully protected area; PA - protected area: PPA & FPA; Period 1 - Before MPA Full Implementation; Period 2 - After MPA Full Implementation) (↑ - Increase; ↓ - Decrease). Species included in the ratios analyses and obtained in the MRT output with IndVal ≥ 20 are shown. (1) Species not included in the ratios analyses; (2) Species with less than 10 individuals in the BA; (3) Species with less than 10 individuals in Period 1; (4) Species with indicator value (IndVal) < 20. [file peerj-06-4653-s009.xls]

## Sheet: TableS8
	Abundance Ratio		Biomass Ratio		Length Ratio					N / B
	Significance		Significance		Significance		Ratios - Observations		MRT	time trend
Species	PA : BA	P2 : P1	PA : BA	P2 : P1	PA : BA	P2 : P1	PA : BA	P2 : P1	Ind Spp	category
Solea senegalensis	> 1	< 1	> 1	< 1	> 1	> 1	N, B, L > PA	N, B ↓, L ↑	Sand	Negative
Pegusa lascaris	< 1	-	< 1	-	< 1	-	N, B, L < PA	-	Sand, BA	Neutral
Arnoglossus imperialis	-	-	-	-	-	< 1	-	L ↓	Sand, BA
Chelidonichthys obscurus	-	-	-	-	-	< 1	-	L ↓	Mud, BA&PPA
Torpedo torpedo	> 1	-	> 1	-	-	-	N, B > PA	-	Sand, PA, P1 (4)
Myliobatis aquila	> 1	-	> 1	-	-	-	N, B > PA	-	Sand, PA, P1 (4)
Chelidonichthys lastoviza	> 1	-	> 1	-	-	-	N, B > PA	-	Sand PA
Halobatrachus didactylus	> 1	-	> 1	-	> 1	-	N, B, L > PA	-	Sand, PA, P1 (4)
Serranus cabrilla	(1)	(1)	(1)	(1)	(1)	(1)	(1)	(1)	Mud, FPA
Merluccius merluccius	-	-	-	-	> 1	> 1	L > PA	L ↑	Mud, BA&PPA
Bothus podas	-	-	-	-	> 1	> 1	L > PA	L ↑	Sand, BA
Mustelus mustelus	-	-	-	-	> 1	> 1	L > PA	L ↑	-
Solea solea	> 1	-	> 1	-	(2)	> 1	N, B > PA	L ↑	Mud, FPA
Mullus surmuletus	-	> 1	> 1	-	> 1	-	B, L > PA	N ↑	Mud, BA&PPA (4)	Positive
Raja undulata	-	-	-	> 1	(2)	(3)	-	B ↑	Sand, PA, P1 (4)
Citharus linguatula	> 1	> 1	> 1	> 1	(2)	(3)	N, B > PA	N, B ↑	Mud, FPA
Microchirus azevia	> 1	> 1	> 1	> 1	> 1	> 1	N, B, L > PA	N, B, L ↑	Mud
Rostroraja alba	> 1	> 1	> 1	> 1	> 1	(3)	N, B, L > PA	N, B ↑	Sand, PA, P2
Raja clavata	> 1	> 1	> 1	> 1	> 1	> 1	N, B, L > PA	N, B, L ↑	Sand, PA, P2
Chelidonichthys lucerna	> 1	> 1	> 1	> 1	> 1	> 1	N, B, L > PA	N, B, L ↑	Sand, PA, P2
