# Supplementary material for: Soft-bottom fishes and spatial protection: findings from a temperate marine protected area
Source: PeerJ. 2018 Jun 8;6:e4653. doi: 10.7717/peerj.4653 (PMC5995104; doi:10.7717/peerj.4653)
Supplement: Table S9 — Additional information of species traits: taxonomic family, environment, maximum length, market price and reproduction (mode, length and age at maturity) (references of length/age at maturity listed). Fisheries category is shown in the ‘price per kg’ column: T - target, B - bycatch, NC - non-commercial. Species ranked according to abundance (N) and biomass (B) time trend category (2nd column; see Table S8). (1) Information not found; (2) Disc width; (3) Hermaphroditic. [file peerj-06-4653-s010.xlsx]

## Sheet: TableS9
	N / B
	time trend	Family	Environment	Reproduction	Price	Maximum	Length at	Age at	Reference
Species	category			mode	per kg (€)	length (cm)	maturity (cm)	maturity (yrs)
Solea senegalensis	Negative	Soleidae	Benthic	Ovuliparous	14.43 (T)	60	32	3.18172	Dinis (1986)
Pegusa lascaris	Neutral	Soleidae	Benthic	Ovuliparous	9.22 (T)	40	23	3.08745	Andrade (1990)
Arnoglossus imperialis		Bothidae	Benthic	Ovuliparous	3.31 (B)	25	(1)	(1)	–
Chelidonichthys obscurus		Triglidae	Benthic	Ovuliparous	1.28 (B)	34	13	0	Muñoz et al. (2003)
Torpedo torpedo		Torpedinidae	Benthic	Ovoviviparous	2.22 (T)	60	26	2.84005	Consalvo et al. (2007)
Myliobatis aquila		Myliobatidae	Benthopelagic	Ovoviviparous	– (NC)	183 (2)	60 (2)	3.66763	Fischer et al. (1987)
Chelidonichthys lastoviza		Triglidae	Benthic	Ovuliparous	1.28 (B)	40	16	3.05965	Jrad et al. (2010)
Halobatrachus didactylus		Batrachoididae	Benthic	Ovuliparous	3.54 (T)	50	30	4.99495	Palazón-Fernández et al. (2001)
Serranus cabrilla		Serranidae	Benthic	Ovuliparous (3)	3.25 (T)	40	15	2.6824	García-Díaz et al. (1997)
Merluccius merluccius		Merlucciidae	Benthopelagic	Ovuliparous	4.19 (T)	140	45	4.42082	Piñeiro & Saínza (2003)
Bothus podas		Bothidae	Benthic	Ovuliparous	3.31 (B)	45	14	1.80817	Morato et al. (2007)
Mustelus mustelus		Triakidae	Benthopelagic	Viviparous	2.69 (T)	200	140	15	Smale & Compagno (1997)
Solea solea		Soleidae	Benthic	Ovuliparous	14.43 (T)	70	30	3.6482	Dinis (1986)
Mullus surmuletus	Positive	Mullidae	Benthic	Ovuliparous	10.94 (T)	40	15	1.7579	Morales-Nin (1991)
Raja undulata		Rajidae	Benthic	Oviparous	2.60 (T)	100	76	8.10874	Coelho & Erzini (2006)
Citharus linguatula		Citharidae	Benthic	Ovuliparous	3.31 (B)	30	19	5.01545	Teixeira et al. (2010)
Microchirus azevia		Soleidae	Benthic	Ovuliparous	9.22 (T)	40	23	2.79845	Afonso-Dias et al. (2005)
Rostroraja alba		Rajidae	Benthic	Oviparous	2.60 (T)	240	129	27.2285	Kadri et al. (2014a)
Raja clavata		Rajidae	Benthic	Oviparous	2.60 (T)	139	78	7.45267	Serra-Pereira et al. (2011)
Chelidonichthys lucerna		Triglidae	Benthic	Ovuliparous	1.28 (T)	75	25	3.08837	Vallisneri et al. (2011)
